# Supplementary material for: Formulation of a covalently bonded hydroxyapatite and poly(ether ether ketone) composite
Source: PubMed Central journal article supplement (PMC6299303; doi:10.1177/2041731418815570), 2018-12-17
Supplement: Supporting_information_EABH_2018.pdf [file Supporting_information_EABH_2018.pdf]

## Supplementary information

### Formulation of a covalently bonded hydroxyapatite and poly(ether ether ketone) composite

Erik A. B. Hughes <sup>a,b\*</sup>, Andrew Parkes <sup>c</sup>, Richard L. Williams <sup>a</sup>, Mike J. Jenkins <sup>c</sup>, and Liam M. Grover <sup>a</sup>

<sup>a</sup> School of Chemical Engineering, University of Birmingham, Edgbaston, B15 2TT, U.K.

<sup>b</sup> NIHR Surgical Reconstruction and Microbiology Research Centre, Queen Elizabeth Hospital, Birmingham, U.K.

<sup>c</sup> School of Metallurgy and Materials, University of Birmingham, Edgbaston, B15 2TT, U.K.

\*Corresponding author: e.a.b.hughes@bham.ac.uk

## Figures

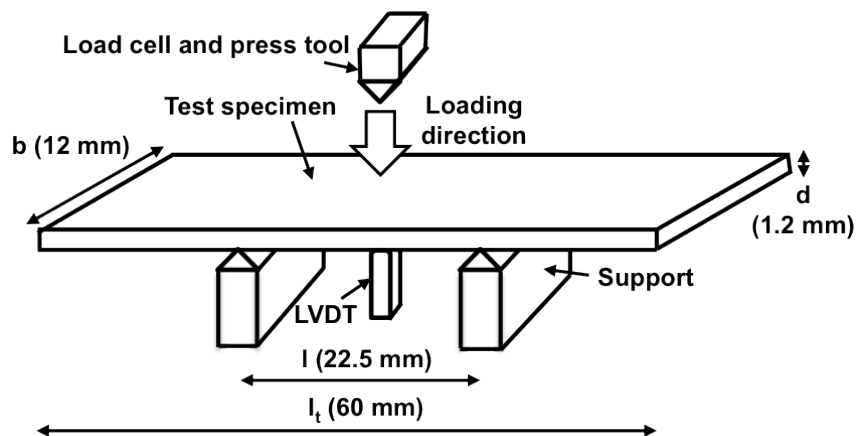

**Figure S1** Schematic of mechanical 3-point bend testing set-up, where  $b$  = specimen width,  $d$  = specimen thickness,  $l$  = separation length between supports,  $l_t$  = total specimen length, and LVDT = linear variable displacement

transducer. Specimen dimensions and support separation distance comply with ASTM D790/ISO 178 standard.

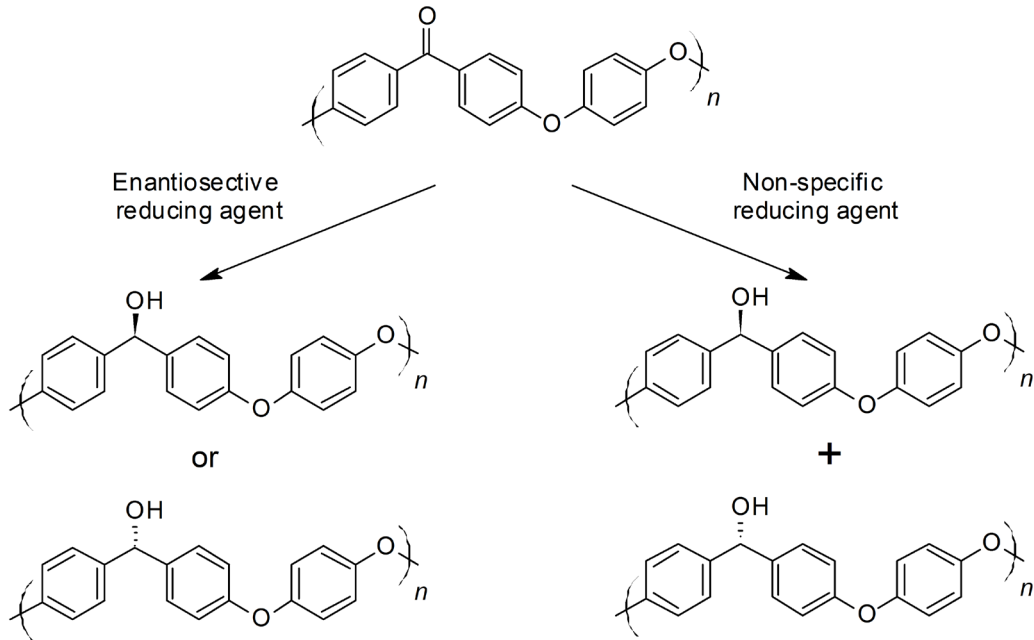

**Figure S2** PEEK reduction to PEEK-OH by entioselective and non-specific reducing agents

Chirality is introduced when PEEK is chemically modified by reducing agents facilitating the conversion of =O groups to -OH groups. An enantioselective reducing agent may produce only one enantiomer of PEEK-OH, whereby the -OH groups are configured in one direction. Because  $\text{NaBH}_4$  is non-selective, a mixture of PEEK-OH enantiomers is expected. The mixture of resulting -OH group configurations may disrupt forming crystallites of the material leading to an increase in the amorphous nature of PEEK-OH compared to PEEK.

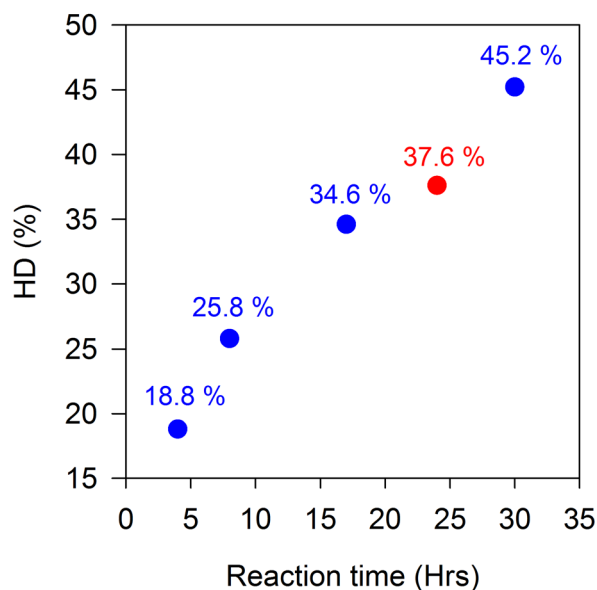

**Figure S3** PEEK-OH hydroxylation degree (HD) resulting from the reaction of PEEK with  $\text{NaBH}_4$  at various reaction times. Shown in red is the value for HD acquired in this work, whilst values shown in blue are those reported by Díez-Pascual and colleagues [1].

### Equations

$$C = \frac{A}{Eb} \quad (\text{Equation S1})$$

$$M = 2.80 \text{ mL} \times \left( C \times \frac{1 \text{ L}}{1000 \text{ mL}} \right) \quad (\text{Equation S2})$$

$$C_{\text{sample}} = \left( \frac{M}{0.25 \text{ mL}} \right) \times \frac{1000 \text{ mL}}{1 \text{ L}} \quad (\text{Equation S3})$$

Where:  $C$  = -SH concentration as measured ( $\text{mol L}^{-1}$ ),  $E$  = TNB molar absorption coefficient,  $14150 \text{ (M}^{-1} \text{ cm}^{-1}\text{)}$ ,  $b$  = path length of cuvette (1 cm),  $M$  = -SH concentration as measured (mol), and  $C_{\text{sample}}$  = -SH concentration of the sampled volume 0.25 mL containing HA-SH ( $\text{mol L}^{-1}$ ).

The concentration of –SH groups was converted from units of mol L<sup>-1</sup> to mol g<sup>-1</sup> by calculating the equivalent mass in grams of HA-SH sample in 1 L and dividing  $C_{sample}$  by this number (e.g. 20 g HA-SH in 1 L so 20).

$$M_{250^{\circ}C} = \left(\frac{M_s}{100}\right) \times \% M_{250^{\circ}C} \quad (\text{Equation S4})$$

$$M_{400^{\circ}C} = \left(\frac{M_s}{100}\right) \times \% M_{400^{\circ}C} \quad (\text{Equation S5})$$

$$M_{OH} = \% M_{400^{\circ}C} - M_{250^{\circ}C} \quad (\text{Equation S6})$$

$$mol_{OH} = \frac{M_{OH}}{Mr_{OH}} \quad (\text{Equation S7})$$

$$M_{PEEK-OH} = mol_{OH} \times Mr_{PEEK-OH} \quad (\text{Equation S8})$$

$$HD = \left(\frac{M_{PEEK-OH}}{M_{250^{\circ}C}}\right) \times 100 \quad (\text{Equation S9})$$

Where:  $M_s$  = TGA sample mass (g),  $M_{250^{\circ}C}$  = TGA sample mass at 250 °C (g),  $\% M_{250^{\circ}C}$  = % TGA sample mass remaining at 250 °C (%),  $M_{400^{\circ}C}$  = TGA sample mass at 400 °C (g),  $\% M_{400^{\circ}C}$  = % TGA sample mass remaining at 400 °C (%),  $M_{OH}$  = Mass of OH groups lost from PEEK-OH between 250 °C and 400 °C (g),  $mol_{OH}$  = Moles of OH groups lost from PEEK-OH between 250 °C - 400 °C (g),  $Mr_{OH}$  = Molar mass of OH group (g mol<sup>-1</sup>),  $M_{PEEK-OH}$  = Mass of PEEK-OH in sample (g),  $Mr_{PEEK-OH}$  = Molar mass of PEEK-OH group (g mol<sup>-1</sup>), and  $HD$  = PEEK-OH hydroxylation degree (%).

$$\sigma_f = \frac{3Fl}{2bd^2} \quad (\text{Equation S10})$$

Where:  $\sigma_f$ = Flexural strength (MPa),  $F$ = Max force before yielding or fracture (N),  $l$ = Test specimen support separation length (mm),  $b$ = Test specimen width (mm), and  $d$ = Test specimen thickness (mm).

$$E_f = \frac{Fl^3}{4bd^3\delta} \quad (\text{Equation S11})$$

Where:  $E_f$ = Flexural modulus (MPa),  $F$ = Force (N),  $l$ = Test specimen support separation length (mm),  $b$ = Test specimen width (mm),  $d$ = Test specimen thickness (mm), and  $\delta$ = Test specimen displacement ( $V_{DC}$ ).

## References

[1] Díez-Pascual AM, Martínez G, Gómez MA. Synthesis and Characterization of Poly(ether ether ketone) Derivatives Obtained by Carbonyl Reduction. *Macromolecules*. 2009;42(18):6885-92.
